# Supplementary material for: Efficiency of multi-trait, indirect, and trait-assisted genomic selection for improvement of biomass sorghum
Source: PubMed Central journal article supplement (PMC5814553; doi:10.1007/s00122-017-3033-y), 2017-12-07
Supplement: 122_2017_3033_MOESM1_ESM.pdf [file 122_2017_3033_MOESM1_ESM.pdf]

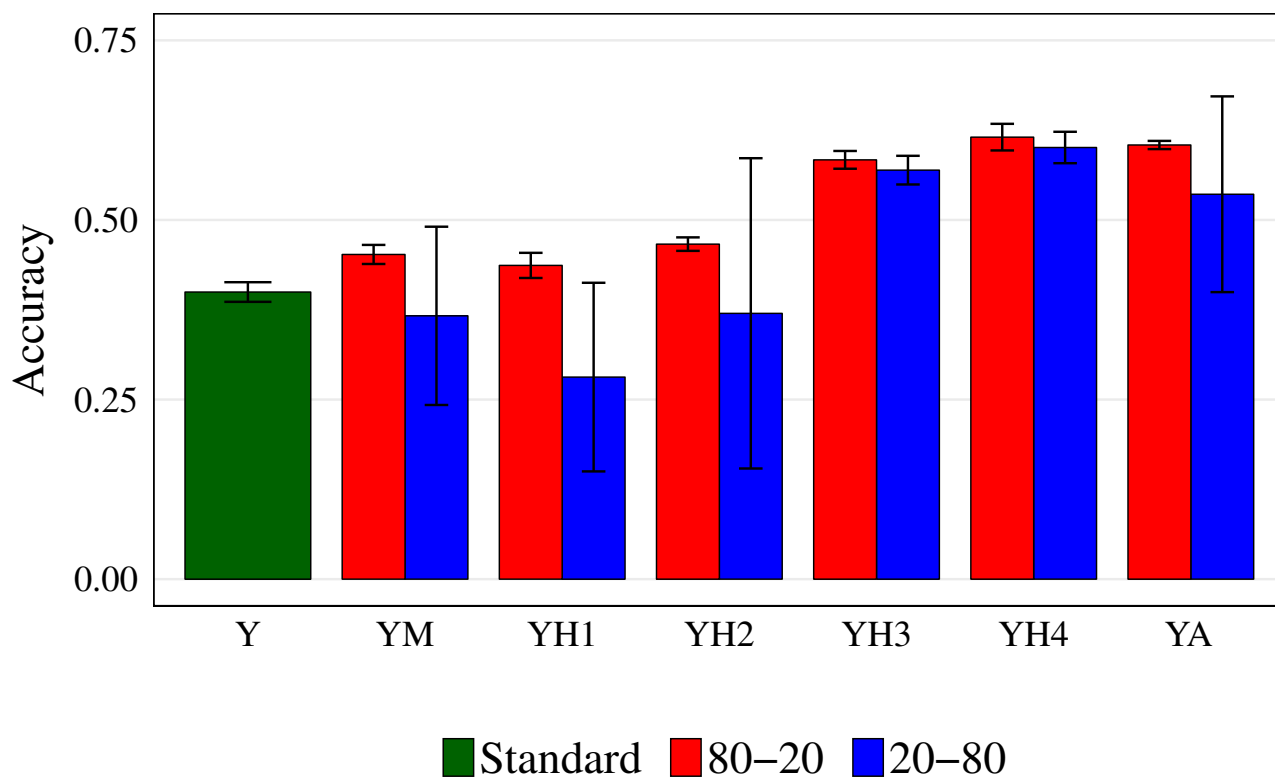

Fig. S1: Prediction accuracy for biomass yield ( $Y$ ) using trait-assisted GS with moisture ( $M$ ), height at 30 ( $H1$ ), 60 ( $H2$ ), 90 ( $H3$ ) and 120 ( $H4$ ) DAP and the area under growth progress curve ( $A$ ) as correlated traits and comparing cross-validation using 80% (80 – 20) or 20% (20 – 80) of the lines as training population. Standard, single-trait GS is shown for comparison. Standard deviations across 30 cross-validation runs are shown.
